# Supplementary material
Source: Springer Nature journal article supplement (https://www.springermedizin.de/resource/supplementary/12889_2010_2378_MOESM1_ESM.pdf/9485594)

High  
education (25%)

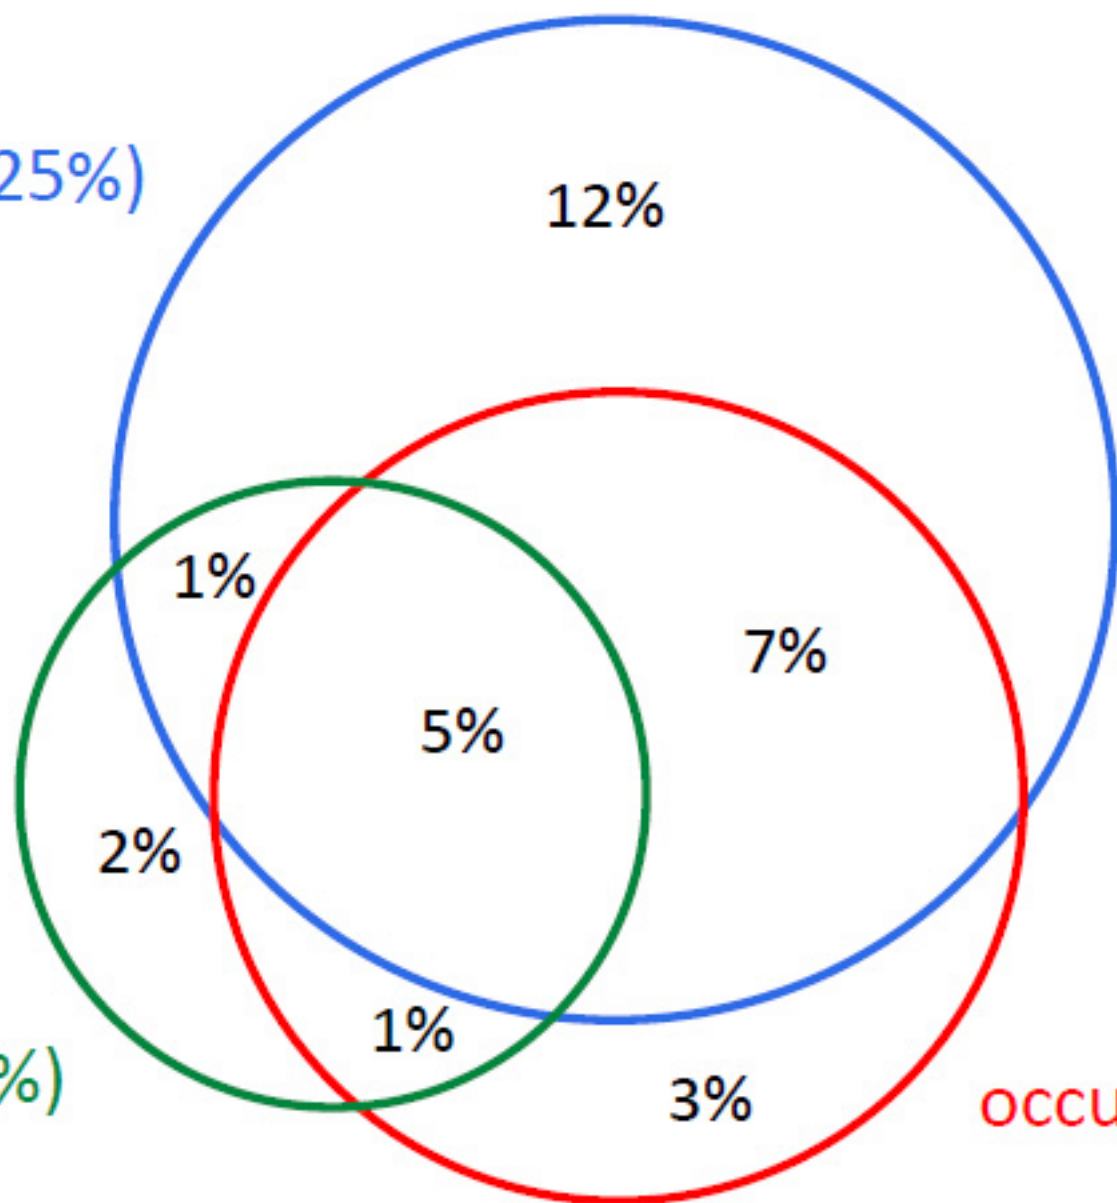

High  
Income (10%)

High  
occupation (17%)

Supplement: MOESM1 [file 9485594]
